# Supplementary material for: Functional Cellular Anti-Tumor Mechanisms are Augmented by Genetic Proteoglycan Targeting
Source: PubMed Central journal article supplement — Neoplasia. 2019 Dec 30;22(2):86–97. doi: 10.1016/j.neo.2019.11.003 (PMC6940629; doi:10.1016/j.neo.2019.11.003), 2019-12-30

## SUPPLEMENTAL FIGURE LEGENDS:

### **Supplemental Figure 1. NF- $\kappa$ B activation response is augmented in HS mutant DCs exposed to LPS.**

Cultured BMDCs harvested from mice carrying a mutation in *Ndst1* (*Ndst1<sup>ff</sup> CD11cCre<sup>+</sup>* mutants) and *Ndst1<sup>ff</sup> CD11cCre<sup>-</sup>* control BMDCs were exposed to LPS (100 ng/ml) for the indicated time periods. NF- $\kappa$ B activation was measured as the phospho-p65 signal (indexed to total protein loading), and was quantified and graphed as the normalized signal to baseline. A minimal response seen by wildtype cells appeared to be augmented in *Ndst1* deficient mutant DCs. (Data reflects responses from 2 independent experiments.)

**Supplemental Figure 2. Titration of antigen exposure for analysis of antigen presentation in BMDCs in mutant and wildtype DCs.** BMDCs from mice deficient in the major HS sulfating enzyme *Ndst1* (*Ndst1<sup>ff</sup> CD11cCre<sup>+</sup>* mutants) and wildtype *Cre<sup>-</sup>* control BMDCs were exposed to Ova SIINFEKL peptide and examined for SIINFEKL antigen presentation by flow cytometry using SIINFEKL/H-2Kb monoclonal antibody clone 25-D1.16 that detects SIINFEKL in the context of MHC-I on the DC surface. SIINFEKL antigen was given either overnight (o/n) or as a 2hr pulse, which boosts antigen on the cell-surface. Graphs show –fold presentation responses for SIINFEKL exposed cells normalized to that of control cells with no pre-exposure to SIINFEKL run in parallel. (LPS stimulates antigen presence on the DC surface to some extent; right graph). Nevertheless, in either non-LPS or +LPS conditions, mutation resulted in augmented antigen presentation, and to a greater degree after a 2 hr pulse exposure than after overnight exposure. (Data is from cultured DCs that were also employed for glycan compositional analysis to confirm inhibitory effect of *Ndst1* mutation on glycan disaccharide sulfation; refer to main Fig.3B)

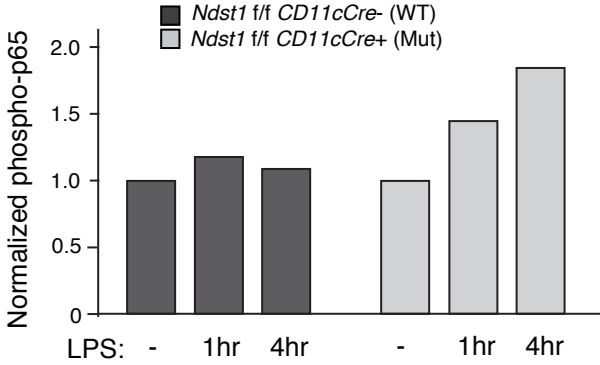

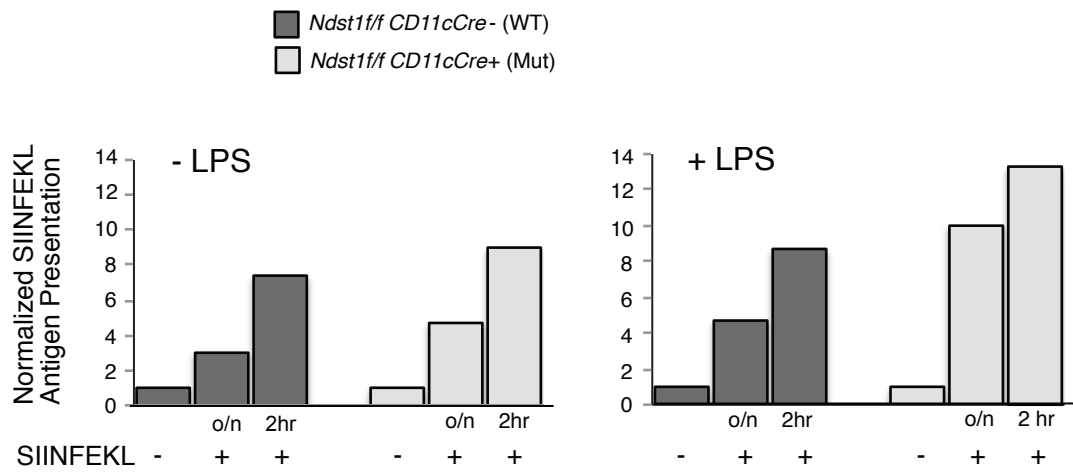

Supplement: mmc1.pdf [file mmc1.pdf]
